# Supplementary material for: Influence of the Position and Composition of Radiometals and Radioiodine Labels on Imaging of Epcam Expression in Prostate Cancer Model Using the DARPin Ec1
Source: MDPI journal article supplement (doi:10.3390/cancers13143589), 2021-07-17
Supplement: s1 [file s1]

**A DOTA-CE<sub>3</sub>-Ec1-(HE)<sub>3</sub>**

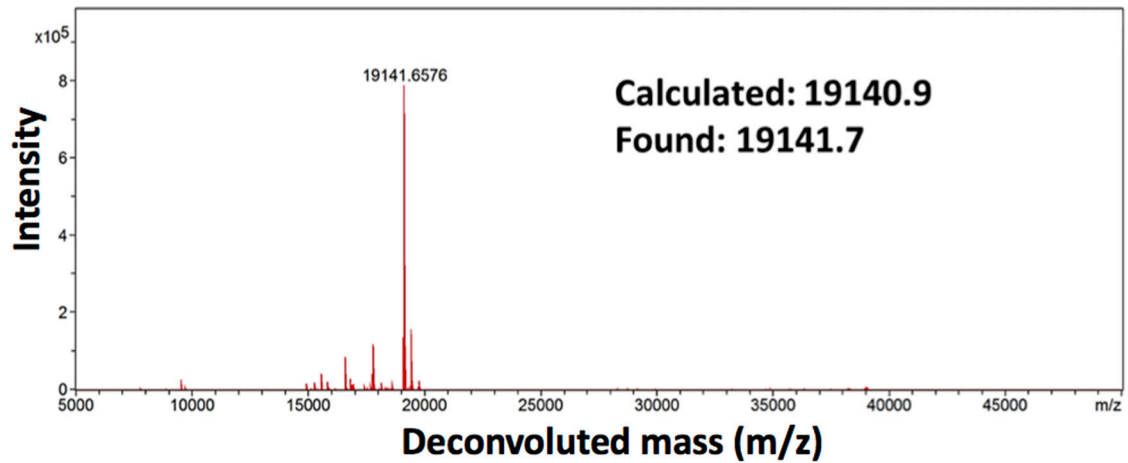

**B (HE)<sub>3</sub>-Ec1-E<sub>3</sub>C-DOTA**

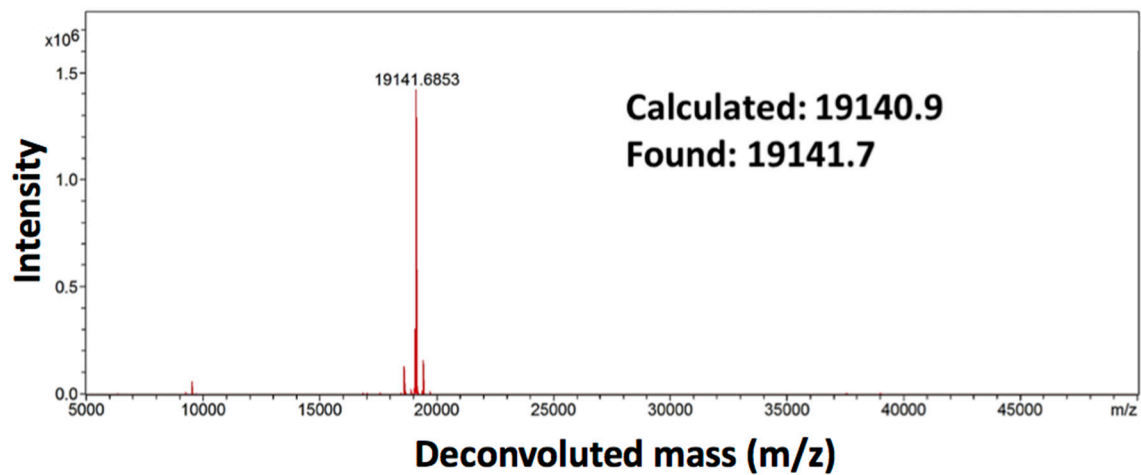

**Supplementary Figure S1.** ESI-MS spectra of Ec1 variants conjugated to DOTA chelator at N- or C-terminus. Calculated molecular weight for both variants 19140.9, found 19141.7 for (A) N-terminal DOTA-CE<sub>3</sub>-Ec1-(HE)<sub>3</sub> and 19141.7 for (B) C-terminal (HE)<sub>3</sub>-CE<sub>3</sub>-Ec1-DOTA.

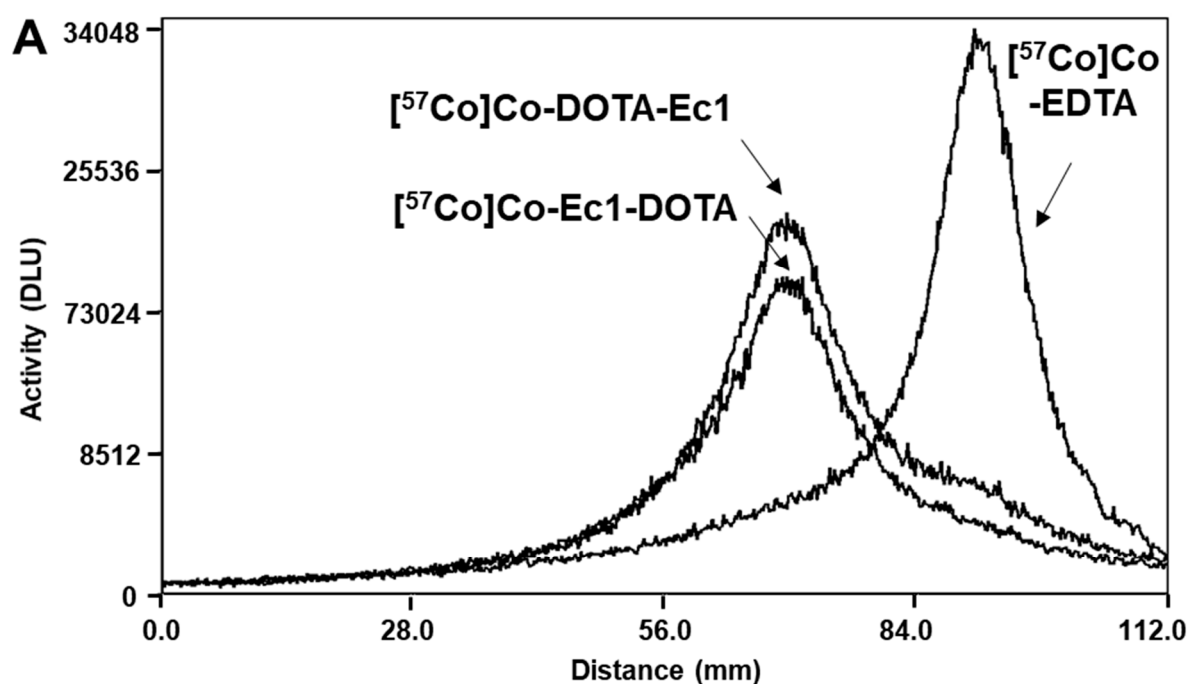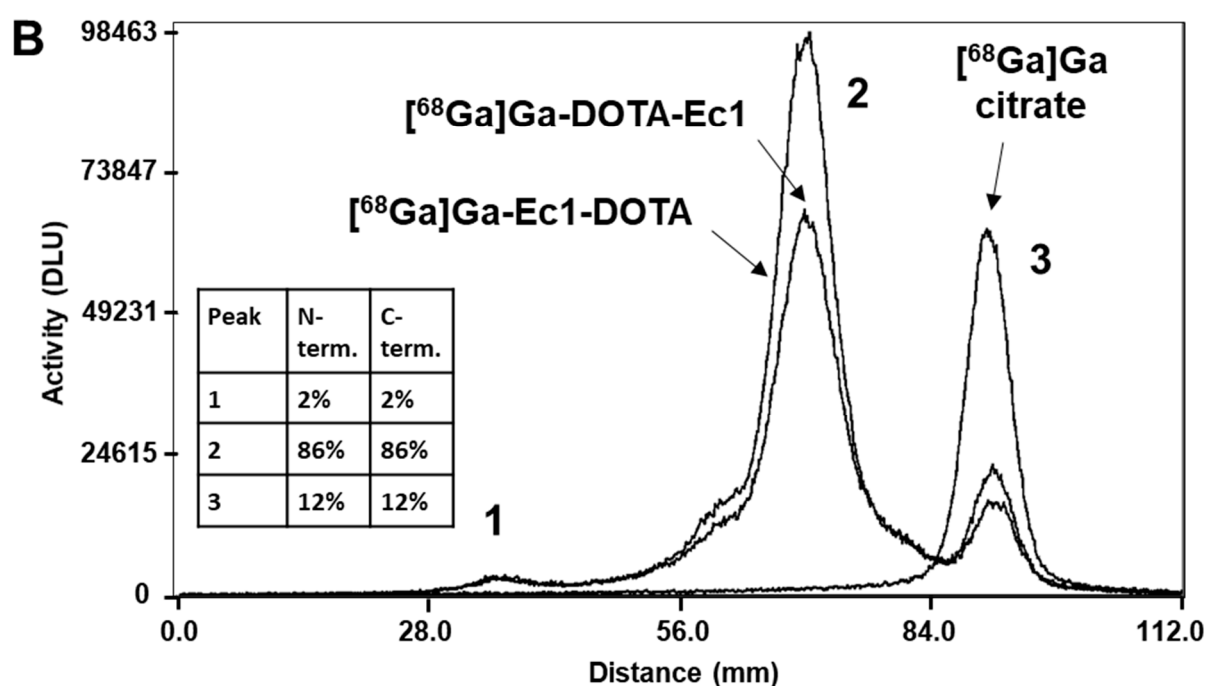

**Supplementary Figure S2.** SDS-PAGE analysis of (A)  $[^{57}\text{Co}]\text{Co-DOTA-Ec1}$  and  $[^{57}\text{Co}]\text{Co-Ec1-DOTA}$ , and (B)  $[^{68}\text{Ga}]\text{Ga-DOTA-Ec1}$  and  $[^{68}\text{Ga}]\text{Ga-Ec1-DOTA}$ .  $[^{57}\text{Co}]\text{Co-EDTA}$  or  $[^{68}\text{Ga}]\text{Ga-citrate}$  were used as markers for low molecular weight compounds.

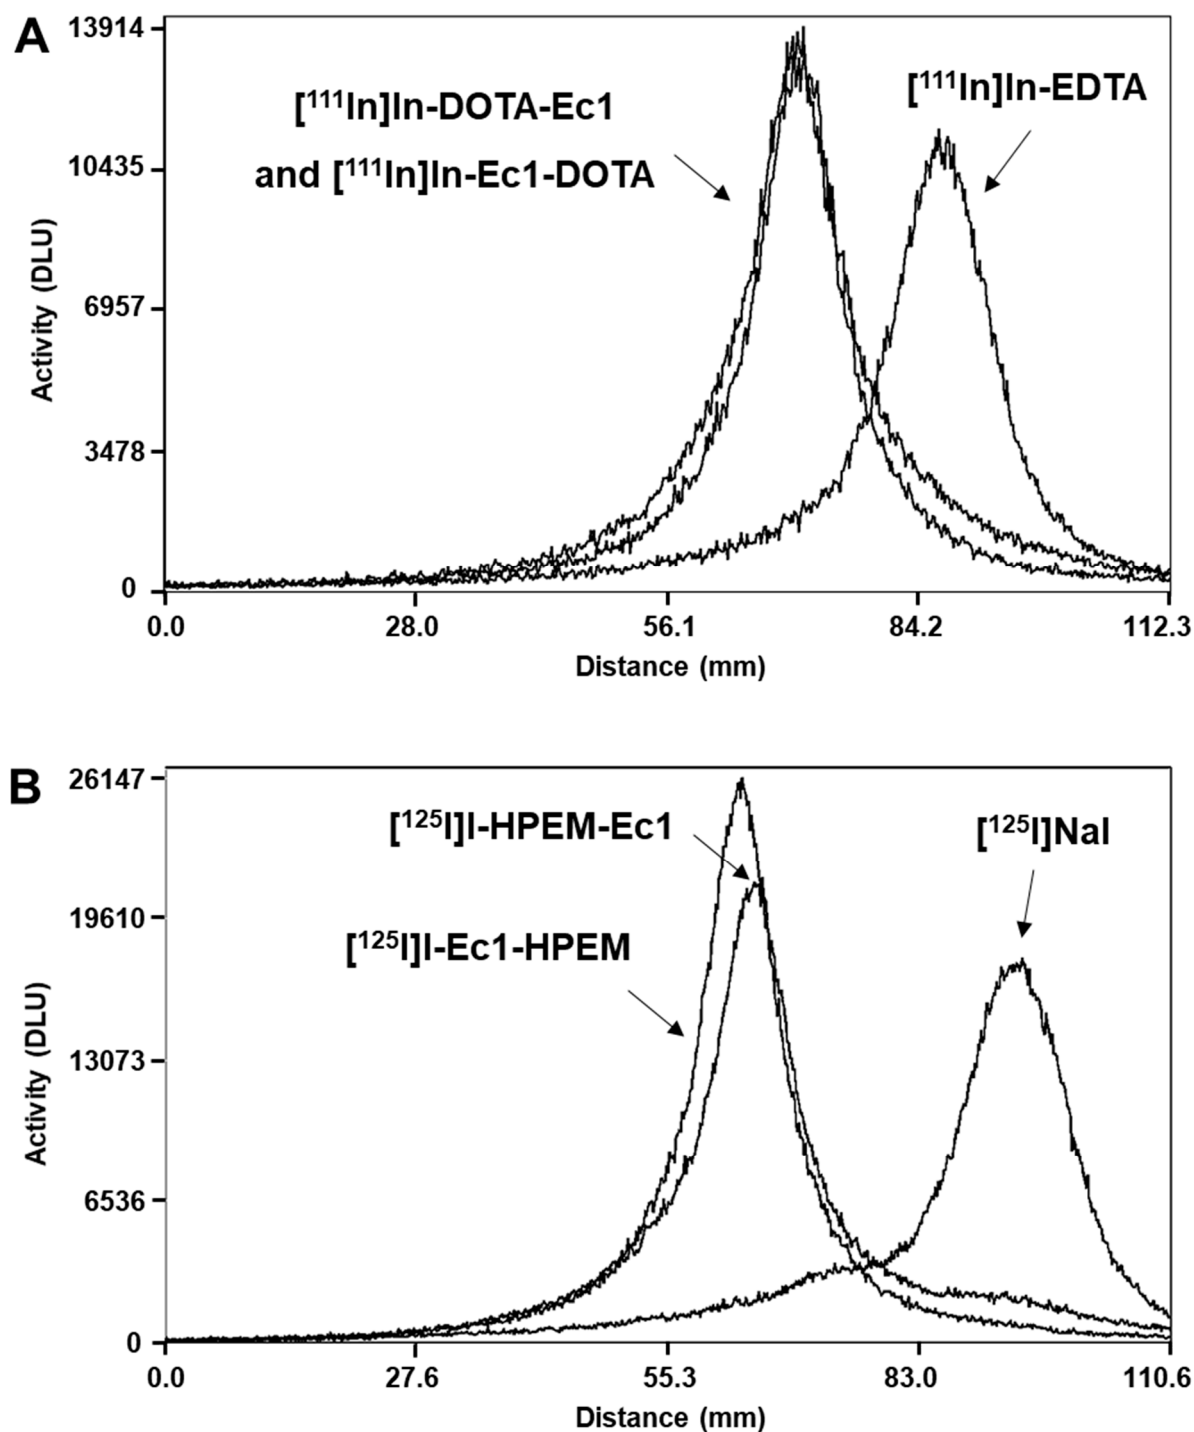

**Supplementary Figure S3.** SDS-PAGE analysis of (A)  $[^{111}\text{In}]\text{In-DOTA-Ec1}$  and  $[^{111}\text{In}]\text{In-Ec1-DOTA}$ , and (B)  $[^{125}\text{I}]\text{I-HPeM-Ec1}$  and  $[^{125}\text{I}]\text{I-Ec1-HPeM}$ .  $[^{111}\text{In}]\text{In-EDTA}$  or  $[^{125}\text{I}]\text{NaI}$  were used as markers for low molecular weight compounds.

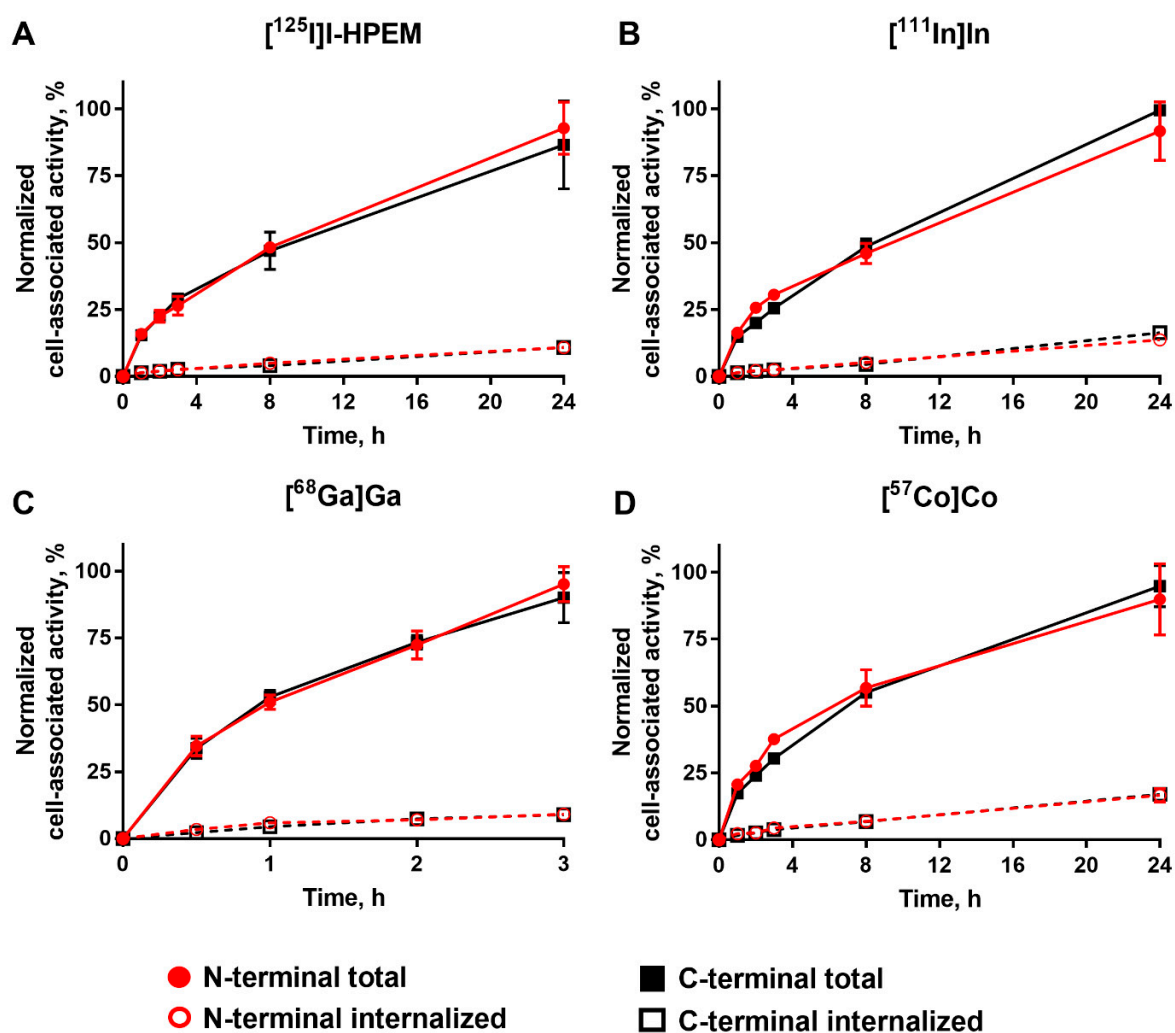

**Figure S4.** Cellular processing of Ec1 variants radiolabeled with (A)  $[^{125}\text{I}]\text{I-HPEM}$ , (B)  $[^{111}\text{In}]\text{In}$ , (C)  $[^{68}\text{Ga}]\text{Ga}$  and (D)  $[^{57}\text{Co}]\text{Co}$  at N- or C-terminus, by DU145 prostate cancer cells during continuous incubation over 24 h (for  $[^{68}\text{Ga}]\text{Ga}$  over 3 h). Data are presented as mean from three samples  $\pm$  SD; error bars may not be visible when they are smaller than symbols.

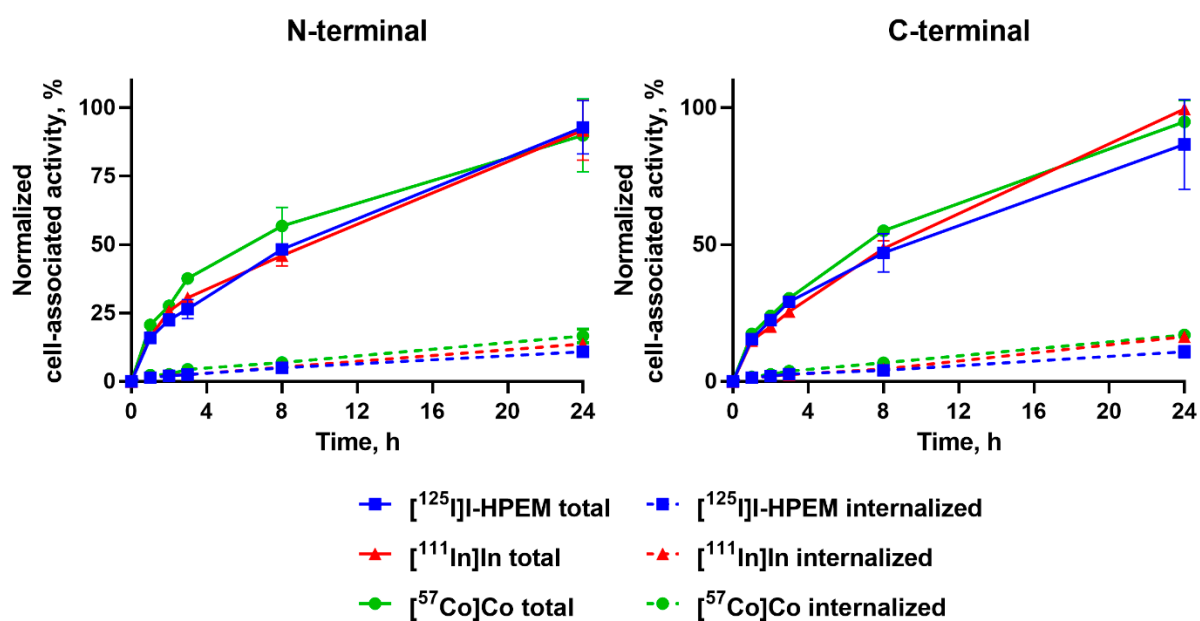

**Figure S5.** Overlay of cellular processing data for Ec1 variants radiolabeled with  $[^{125}\text{I}]\text{I-HPEM}$ ,  $[^{111}\text{In}]\text{In}$ , and  $[^{57}\text{Co}]\text{Co}$  at N- or C-terminus, by DU145 prostate cancer cells during continuous incubation over 24 h. Data are presented as mean from three samples  $\pm$  SD; error bars may not be visible when they are smaller than symbols.
